# Supplementary material
Source: Springer Nature journal article supplement (https://www.springermedizin.de/resource/supplementary/12884_2011_461_MOESM5_ESM.pdf/9457956)

**Number of  
non-SBA births  
(millions)**

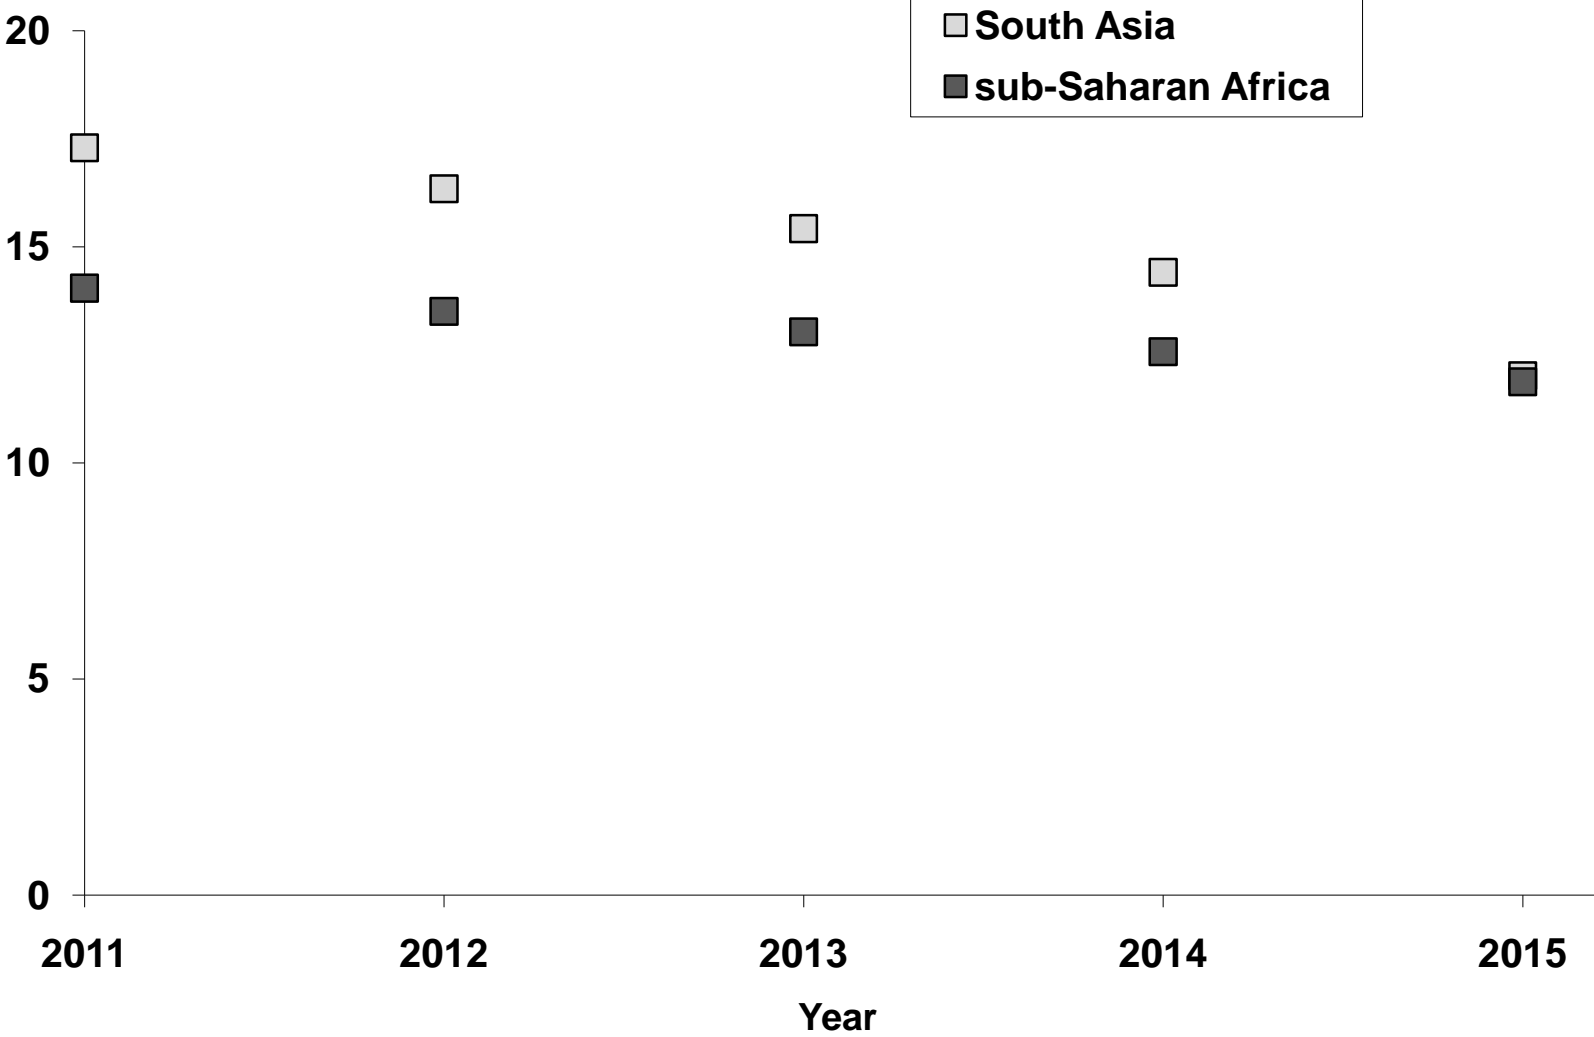

Supplement: MOESM5 [file 9457956]
